# Supplementary material for: RANBP2 Activates O-GlcNAcylation through Inducing CEBPα-Dependent OGA Downregulation to Promote Hepatocellular Carcinoma Malignant Phenotypes
Source: MDPI journal article supplement (doi:10.3390/cancers13143475), 2021-07-12
Supplement: s1 [file s1]

# qPCR data\_Supplemental Figure 3B\_OGT & OGA mRNA expression

## Hep3B OGT

| Well | Sample Name | Ct      | RQ     | RQ Mean | $\Delta C_t$ | $-\Delta\Delta C_t$ |
|------|-------------|---------|--------|---------|--------------|---------------------|
| A1   | A           | 27.094  | 1.0955 | 1.0872  | 8.4479       | 0.1316              |
| A2   | A           | 27.2509 | 1      |         | 8.5795       | 0                   |
| A3   | A           | 27.2658 | 1.1661 |         | 8.3578       | 0.2217              |
| A4   | A-GAPDH     | 18.6461 |        |         |              |                     |
| A5   | A-GAPDH     | 18.6714 |        |         |              |                     |
| A6   | A-GAPDH     | 18.908  |        |         |              |                     |
| B1   | B           | 27.1773 | 0.9318 | 0.9579  | 8.6814       | -0.1019             |
| B2   | B           | 27.1879 | 0.967  |         | 8.6279       | -0.0484             |
| B3   | B           | 27.0309 | 0.9748 |         | 8.6163       | -0.0368             |
| B4   | B-GAPDH     | 18.4959 |        |         |              |                     |
| B5   | B-GAPDH     | 18.56   |        |         |              |                     |
| B6   | B-GAPDH     | 18.4146 |        |         |              |                     |

## HepG2 OGT

| Well | Sample Name | Ct      | RQ     | RQ Mean | $\Delta C_t$ | $-\Delta\Delta C_t$ |
|------|-------------|---------|--------|---------|--------------|---------------------|
| A1   | A           | 27.4706 | 1.0795 | 1.0324  | 8.9968       | 0.1104              |
| A2   | A           | 27.4536 | 1      |         | 9.1072       | 0                   |
| A3   | A           | 27.5249 | 1.0176 |         | 9.0821       | 0.0251              |
| A4   | A-GAPDH     | 18.4738 |        |         |              |                     |
| A5   | A-GAPDH     | 18.3464 |        |         |              |                     |
| A6   | A-GAPDH     | 18.4428 |        |         |              |                     |
| B1   | B           | 28.2783 | 0.9697 | 0.9991  | 9.1516       | -0.0444             |
| B2   | B           | 27.9515 | 1.0222 |         | 9.0755       | 0.0317              |
| B3   | B           | 27.9587 | 1.0053 |         | 9.0996       | 0.0076              |
| B4   | B-GAPDH     | 19.1267 |        |         |              |                     |
| B5   | B-GAPDH     | 18.876  |        |         |              |                     |
| B6   | B-GAPDH     | 18.8591 |        |         |              |                     |

**Hep3B OGA**

| Well | Sample Name | C <sub>T</sub> | RQ     | RQ Mean | ΔC <sub>T</sub> | $-\Delta\Delta C_T$ |
|------|-------------|----------------|--------|---------|-----------------|---------------------|
| A1   | A           | 27.3073        | 1      | 1.0542  | 8.465           | 0                   |
| A2   | A           | 27.3135        | 1.0567 |         | 8.3855          | 0.0795              |
| A3   | A           | 27.1049        | 1.106  |         | 8.3197          | 0.1453              |
| A4   | A-GAPDH     | 18.8423        |        |         |                 |                     |
| A5   | A-GAPDH     | 18.928         |        |         |                 |                     |
| A6   | A-GAPDH     | 18.7852        |        |         |                 |                     |
| B1   | B           | 25.5998        | 3.2564 | 3.136   | 6.7617          | 1.7033              |
| B2   | B           | 26.0018        | 2.9982 |         | 6.8809          | 1.5841              |
| B3   | B           | 25.6629        | 3.1532 |         | 6.8082          | 1.6568              |
| B4   | B-GAPDH     | 18.8381        |        |         |                 |                     |
| B5   | B-GAPDH     | 19.1209        |        |         |                 |                     |
| B6   | B-GAPDH     | 18.8547        |        |         |                 |                     |

**HepG2 OGA**

| Well | Sample Name | C <sub>T</sub> | RQ     | RQ Mean | ΔC <sub>T</sub> | $-\Delta\Delta C_T$ |
|------|-------------|----------------|--------|---------|-----------------|---------------------|
| A1   | A           | 27.435         | 1.0575 | 1.0569  | 8.8677          | 0.0806              |
| A2   | A           | 27.4569        | 1      |         | 8.9483          | 0                   |
| A3   | A           | 27.3525        | 1.1132 |         | 8.7936          | 0.1547              |
| A4   | A-GAPDH     | 18.5673        |        |         |                 |                     |
| A5   | A-GAPDH     | 18.5086        |        |         |                 |                     |
| A6   | A-GAPDH     | 18.5589        |        |         |                 |                     |
| B1   | B           | 26.4244        | 2.5489 | 2.6337  | 7.5984          | 1.3499              |
| B2   | B           | 26.4109        | 2.7313 |         | 7.4987          | 1.4496              |
| B3   | B           | 26.6926        | 2.621  |         | 7.5582          | 1.3901              |
| B4   | B-GAPDH     | 18.826         |        |         |                 |                     |
| B5   | B-GAPDH     | 18.9122        |        |         |                 |                     |
| B6   | B-GAPDH     | 19.1344        |        |         |                 |                     |
