# Supplementary material for: RANBP2 Activates O-GlcNAcylation through Inducing CEBPα-Dependent OGA Downregulation to Promote Hepatocellular Carcinoma Malignant Phenotypes
Source: MDPI journal article supplement (doi:10.3390/cancers13143475), 2021-07-12
Supplement: s1 [file s1]

qPCR data\_  
Figure 4E\_  
CHIP assay

| Cell Lines | Group   | Sample Name | Ct      | ΔCt     | ΔΔCt   | RQ      | RQ mean | Expression (mean) in CHIP group |
|------------|---------|-------------|---------|---------|--------|---------|---------|---------------------------------|
| Hep3B      | A-IgG   | A           | 30.6799 | 12.1598 | 0      | 1       | 1.1099  | 1.1099                          |
|            | A-IgG   | A           | 30.7453 | 11.8987 | 0.2611 | 1.1984  |         |                                 |
|            | A-IgG   | A           | 30.8037 | 11.9819 | 0.1779 | 1.1312  |         |                                 |
|            | A-CHIP  | B           | 27.1537 | 8.6336  | 3.5262 | 11.521  | 13.7853 | 11.0138                         |
|            | A-CHIP  | B           | 27.0148 | 8.1682  | 3.9916 | 15.9071 |         |                                 |
|            | A-CHIP  | B           | 27.1817 | 8.3599  | 3.7999 | 13.9278 |         |                                 |
|            | A-Input | C           | 26.9173 | 8.3972  | 3.7626 | 13.5724 | 17.2543 |                                 |
|            | A-Input | C           | 26.735  | 7.8884  | 4.2714 | 19.3117 |         |                                 |
|            | A-Input | C           | 26.7429 | 7.9211  | 4.2387 | 18.8789 |         |                                 |
|            | A-GAPDH | D-internal  | 18.5201 |         |        |         |         |                                 |
|            | A-GAPDH | D-internal  | 18.8466 |         |        |         |         |                                 |
|            | A-GAPDH | D-internal  | 18.8218 |         |        |         |         |                                 |
|            | B-IgG   | E           | 31.1508 | 12.3879 | 0.3248 | 1.2525  | 1.1518  | 1.1518                          |
|            | B-IgG   | E           | 31.2261 | 12.7127 | 0      | 1       |         |                                 |
|            | B-IgG   | E           | 31.2262 | 12.4461 | 0.2666 | 1.203   |         |                                 |
|            | B-CHIP  | F           | 27.1207 | 8.3578  | 4.3549 | 20.4624 | 19.0538 | 16.937                          |
|            | B-CHIP  | F           | 27.2334 | 8.72    | 3.9927 | 15.9192 |         |                                 |
|            | B-CHIP  | F           | 27.1157 | 8.3356  | 4.3771 | 20.7797 |         |                                 |
|            | B-Input | G           | 26.9415 | 8.1786  | 4.5341 | 23.1686 | 21.435  |                                 |
|            | B-Input | G           | 27.1123 | 8.5989  | 4.1138 | 17.3132 |         |                                 |
|            | B-Input | G           | 26.9185 | 8.1384  | 4.5743 | 23.8233 |         |                                 |
|            | B-GAPDH | H-internal  | 18.7629 |         |        |         |         |                                 |
|            | B-GAPDH | H-internal  | 18.5134 |         |        |         |         |                                 |
|            | B-GAPDH | H-internal  | 18.7801 |         |        |         |         |                                 |
|            | C-IgG   | I           | 30.4259 | 12.0845 | 0.1313 | 1.0953  | 1.0575  | 1.0575                          |
|            | C-IgG   | I           | 30.75   | 12.2158 | 0      | 1       |         |                                 |
|            | C-IgG   | I           | 30.6251 | 12.1083 | 0.1075 | 1.0774  |         |                                 |
|            | C-CHIP  | J           | 27.6074 | 9.266   | 2.9498 | 7.7264  | 8.846   | 5.6096                          |
|            | C-CHIP  | J           | 27.4787 | 8.9445  | 3.2713 | 9.6552  |         |                                 |
|            | C-CHIP  | J           | 27.5378 | 9.021   | 3.1948 | 9.1565  |         |                                 |
|            | C-Input | K           | 26.8827 | 8.5413  | 3.6745 | 12.7683 | 13.9497 |                                 |
|            | C-Input | K           | 26.92   | 8.3858  | 3.83   | 14.2215 |         |                                 |
|            | C-Input | K           | 26.8393 | 8.3225  | 3.8933 | 14.8594 |         |                                 |
|            | C-GAPDH | L-internal  | 18.3414 |         |        |         |         |                                 |
|            | C-GAPDH | L-internal  | 18.5342 |         |        |         |         |                                 |
|            | C-GAPDH | L-internal  | 18.5168 |         |        |         |         |                                 |

|       |         |            |         |         |        |         |         |        |
|-------|---------|------------|---------|---------|--------|---------|---------|--------|
| HepG2 | D-IgG   | M          | 31.2316 | 12.0144 | 0.2989 | 1.2302  | 1.1869  | 1.1869 |
|       | D-IgG   | M          | 31.36   | 12.3133 | 0      | 1       |         |        |
|       | D-IgG   | M          | 31.1468 | 11.9013 | 0.412  | 1.3305  |         |        |
|       | D-CHIP  | N          | 27.2834 | 8.0662  | 4.1496 | 17.7482 | 17.1213 | 14.605 |
|       | D-CHIP  | N          | 27.3122 | 8.2655  | 3.9503 | 15.4582 |         |        |
|       | D-CHIP  | N          | 27.2788 | 8.0333  | 4.1825 | 18.1576 |         |        |
|       | D-Input | O          | 26.973  | 7.7558  | 4.46   | 22.0087 | 20.0712 |        |
|       | D-Input | O          | 27.106  | 8.0593  | 4.1565 | 17.8333 |         |        |
|       | D-Input | O          | 27.1128 | 7.8673  | 4.3485 | 20.3718 |         |        |
|       | D-GAPDH | P-internal | 19.2172 |         |        |         |         |        |
|       | D-GAPDH | P-internal | 19.0467 |         |        |         |         |        |
|       | D-GAPDH | P-internal | 19.2455 |         |        |         |         |        |
|       | E-IgG   | Q          | 31.288  | 11.8444 | 0.0597 | 1.0422  | 1.0175  | 1.0175 |
|       | E-IgG   | Q          | 31.3014 | 11.8892 | 0.0149 | 1.0104  |         |        |
|       | E-IgG   | Q          | 31.1775 | 11.9041 | 0      | 1       |         |        |

|         |            |         |         |        |         |         |         |
|---------|------------|---------|---------|--------|---------|---------|---------|
| E-CHIP  | R          | 27.1593 | 7.7157  | 4.5001 | 22.629  | 22.2378 | 21.0262 |
| E-CHIP  | R          | 27.1546 | 7.7424  | 4.4734 | 22.214  |         |         |
| E-CHIP  | R          | 27.0383 | 7.7649  | 4.4509 | 21.8703 |         |         |
| E-Input | S          | 26.9133 | 7.4697  | 4.7461 | 26.836  | 23.5192 |         |
| E-Input | S          | 27.1257 | 7.7135  | 4.5023 | 22.6635 |         |         |
| E-Input | S          | 27.0929 | 7.8195  | 4.3963 | 21.0581 |         |         |
| E-GAPDH | T-internal | 19.4436 |         |        |         |         |         |
| E-GAPDH | T-internal | 19.4122 |         |        |         |         |         |
| E-GAPDH | T-internal | 19.2734 |         |        |         |         |         |
| F-IgG   | U          | 31.0249 | 11.9289 | 0      | 1       | 1.0754  | 1.0754  |
| F-IgG   | U          | 30.9473 | 11.6532 | 0.2757 | 1.2106  |         |         |
| F-IgG   | U          | 31.0402 | 11.9064 | 0.0225 | 1.0157  |         |         |
| F-CHIP  | V          | 28.1146 | 9.0186  | 2.9103 | 7.5177  | 8.4832  | 4.9193  |
| F-CHIP  | V          | 27.9856 | 8.6915  | 3.2374 | 9.4309  |         |         |
| F-CHIP  | V          | 27.9751 | 8.8413  | 3.0876 | 8.5008  |         |         |
| F-Input | W          | 27.1378 | 8.0418  | 3.8871 | 14.7956 | 14.6289 |         |
| F-Input | W          | 27.3078 | 8.0137  | 3.9152 | 15.0866 |         |         |
| F-Input | W          | 27.2549 | 8.1211  | 3.8078 | 14.0043 |         |         |
| F-GAPDH | X          | 19.096  |         |        |         |         |         |
| F-GAPDH | X          | 19.2941 |         |        |         |         |         |
| F-GAPDH | X          | 19.1338 |         |        |         |         |         |
