# Supplementary material for: RANBP2 Activates O-GlcNAcylation through Inducing CEBPα-Dependent OGA Downregulation to Promote Hepatocellular Carcinoma Malignant Phenotypes
Source: MDPI journal article supplement (doi:10.3390/cancers13143475), 2021-07-12
Supplement: s1 [file s1]

# Supplemental Materials: RANBP2 Activates O-GlcNAcylation through Inducing CEBP $\alpha$ -Dependent OGA Downregulation to Promote Hepatocellular Carcinoma Malignant Phenotypes

Xiaoming Liu, Xingyu Chen, Mengqing Xiao, Yuxing Zhu, Renjie Gong, Jianye Liu, Qinghai Zeng, Canxia Xu, Xiong Chen, Fen Wang and Ke Cao

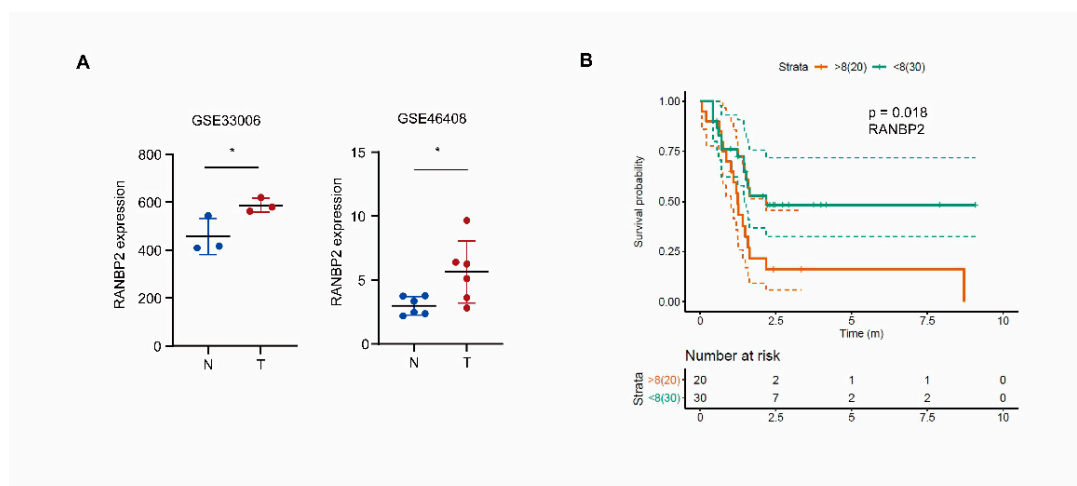

**Figure S1.** RANBP2 is enriched in HCC and indicates poor prognosis. **(A)** RANBP2 mRNA level comparison between HCC and adjacent non-tumor tissue from the GEO databases (GSE33006, GSE46408). \* $p < 0.05$  and \*\*\* $p < 0.001$ , t-test. **(B)** Survival curve from clinical samples showed that RANBP2 was significantly associated with shorter survival in our HCC patients ( $n = 50$ ). Among total 54 patients, 50 cases having follow-up data were selected.

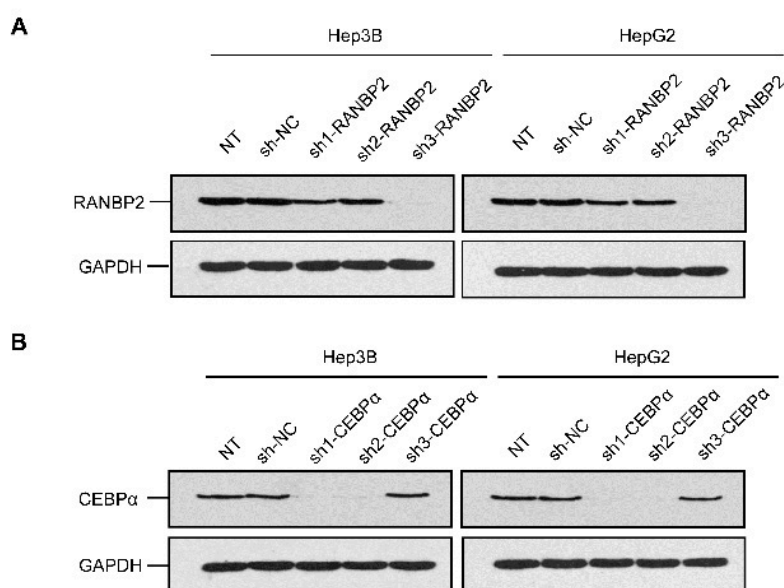

**Figure S2.** Western blotting results of RANBP2 **(A)** and CEBP $\alpha$  **(B)** in response to their different shRNA. The sequence of sh3-RANBP2 and sh1-CEBP $\alpha$  obtained the relatively high knockdown efficiency (RT-qPCR not shown), which were selected for further experiment.

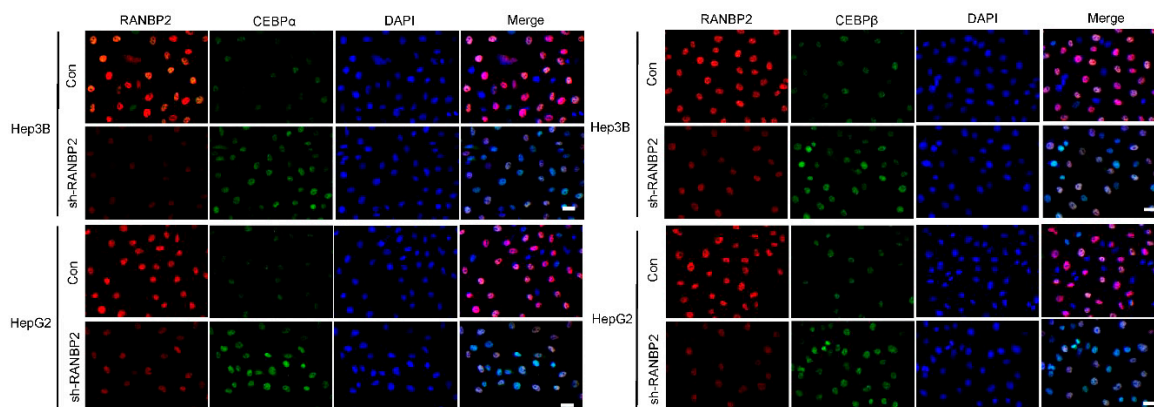

**Figure S3.** The expressional tendencies of endogenous CEBP $\alpha$  and CEBP $\beta$  by immunofluorescence staining. Merge, RANBP2+ CEBP $\alpha$ +DAPI; Scale bars, 20  $\mu$ m.

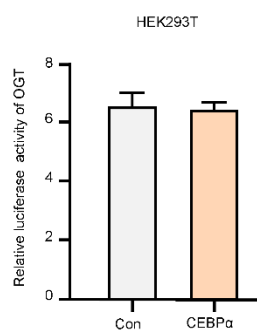

**Figure S4.** Luciferase reporter assay reveals no transcriptional regulation of OGT by CEBP $\alpha$ . The ratio of firefly luciferase activity to Renilla activity was indicated as gene promoter activities. Each experiment was performed in triplicate.

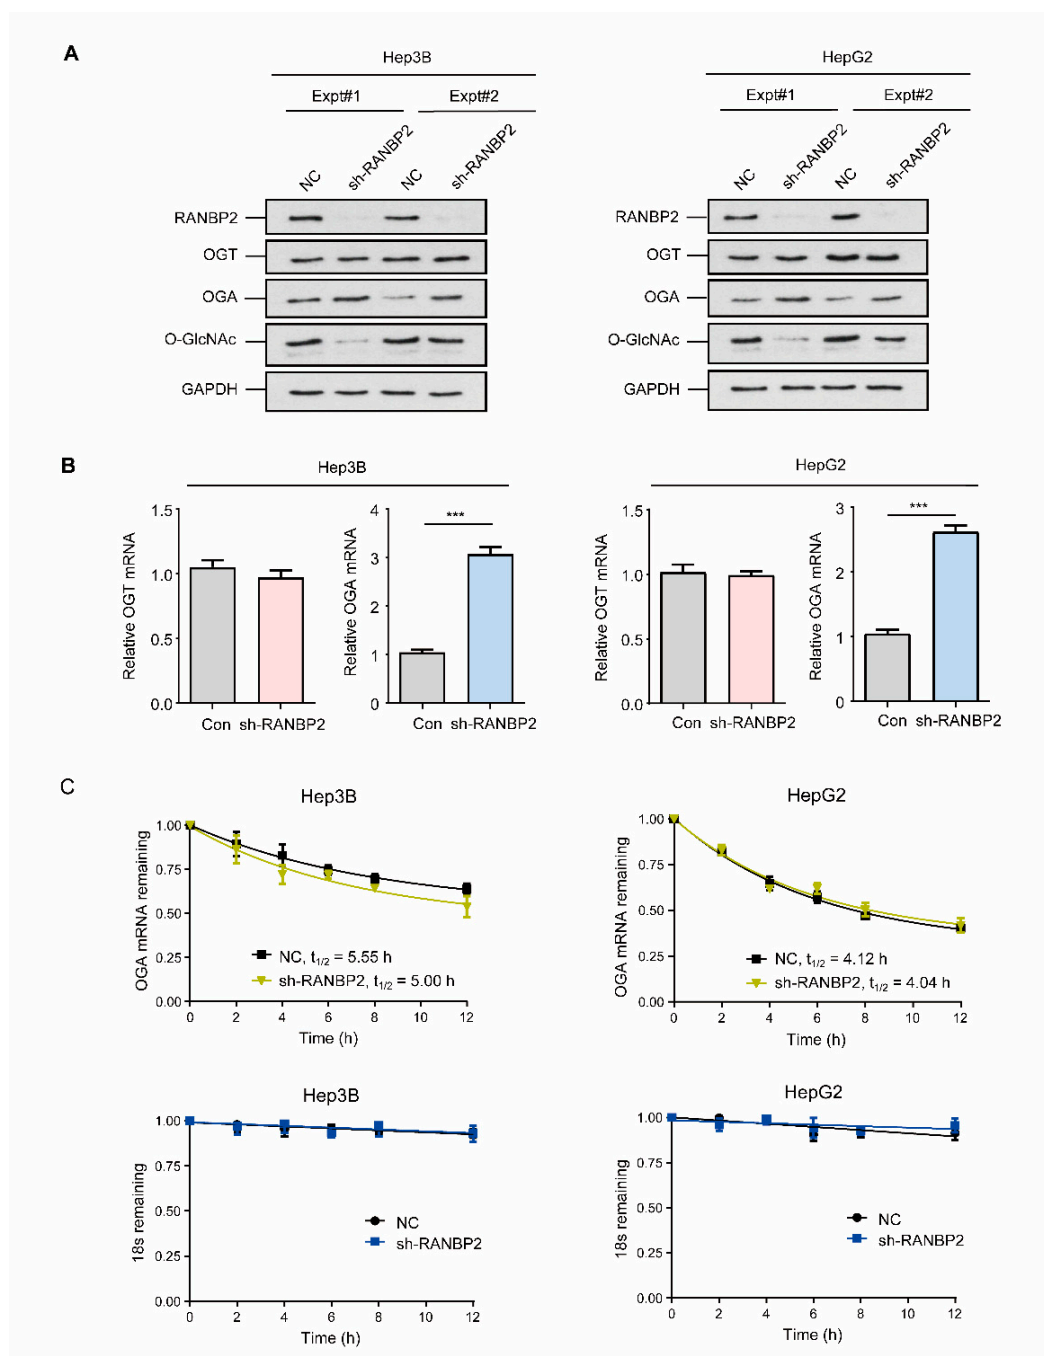

**Figure S5.** RANBP2 promotes *O*-glycosylation via downregulating OGA transcription while not affecting OGT expression. (A) The remarkable *O*-GlcNAc decrease and OGA upregulation were confirmed in the presence of RANBP2 knockdown, while OGT protein expression was unchanged. (B) RANBP2 negatively regulated transcriptional activity of OGA other than OGT. Profiles of OGT and OGA mRNA levels were implicated in sh-RANBP2 Hep3B and HepG2 cells compared to the controls. (C) Measurement of the RNA stability of OGA by RT-qPCR in presence of the transcriptional inhibitor Actinomycin D (ActD) at indicated time points. Half-life of OGA mRNA ( $t_{1/2}$ ) in both cells was calculated from each experiment shown in the graph. 18S rRNA was conducted as an internal control.

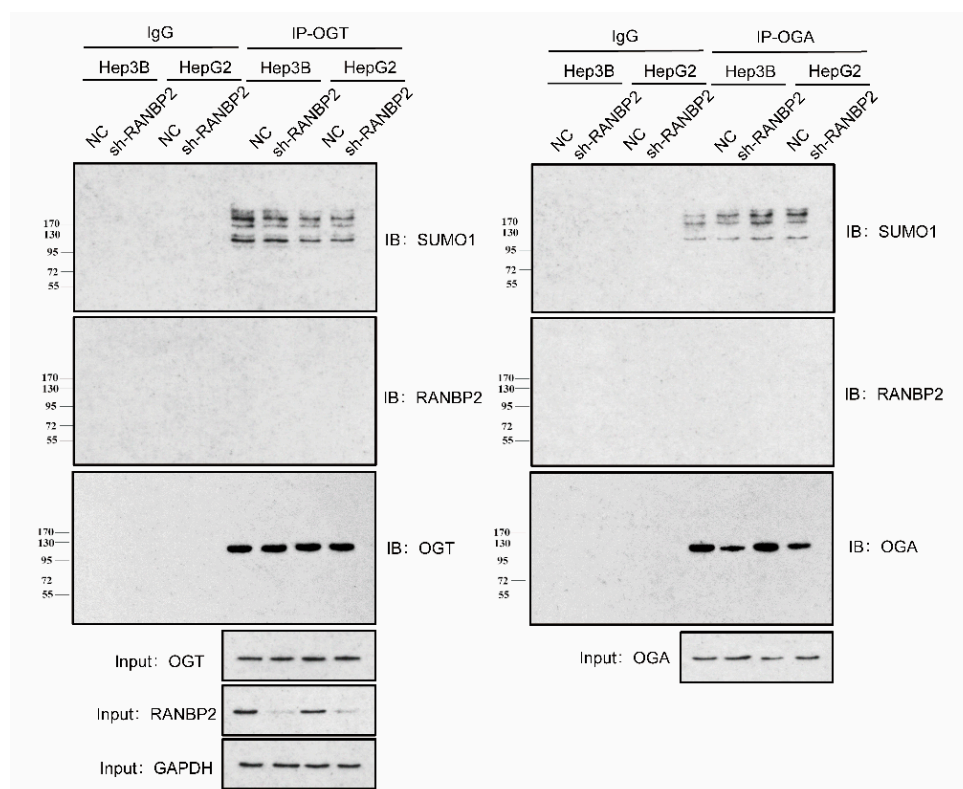

**Figure S6.** RANBP2 associated OGA modulation is independent of SUMOylation. Co-immunoprecipitation showed no protein interactions of OGT-RANBP2 or OGA-RANBP2. The non-changed global SUMO levels of OGT and OGA upon RANBP2 knockdown were also detected using anti-SUMO1 antibody.

**Table S1.** Correlation between RANBP2 expression and clinicopathologic characteristics of the hepatocellular carcinoma patients. Percentage values are shown in parentheses.

| Variables               | Total Number | RANBP2 Expression (%)   |                          | p-Value |
|-------------------------|--------------|-------------------------|--------------------------|---------|
|                         |              | Low expression (n = 21) | High Expression (n = 33) |         |
| Age (y)                 |              |                         |                          | 0.147   |
| ≤53 <sup>a</sup>        | 25           | 8 (32.0)                | 17 (68.0)                |         |
| >53                     | 29           | 13(44.8)                | 16(55.2)                 |         |
| Gender                  |              |                         |                          | 0.006   |
| Male                    | 47           | 15 (31.9)               | 32 (68.1)                |         |
| Female                  | 7            | 6 (85.7)                | 1 (14.3)                 |         |
| Tumor size (cm)         |              |                         |                          | <0.001  |
| ≤6.7 <sup>b</sup>       | 22           | 15 (68.2)               | 7(31.8)                  |         |
| >6.7                    | 32           | 6 (18.8)                | 26 (81.2)                |         |
| Tumor multiplicity      |              |                         |                          | 0.892   |
| Solitary                | 38           | 15 (39.5)               | 23 (60.5)                |         |
| Multiple                | 16           | 6(37.5)                 | 10 (62.5)                |         |
| Edmondson-Steiner grade |              |                         |                          | 0.016   |
| I-II                    | 28           | 16 (57.1)               | 12 (42.9)                |         |
| III                     | 25           | 5 (20.0)                | 20 (80.0)                |         |
| IV                      | 1            | 0 (0)                   | 1(100.0)                 |         |
| pT classification       |              |                         |                          | 0.042   |
| PT1/PT2                 | 30           | 16(53.3)                | 14(46.7)                 |         |
| PT3                     | 22           | 5(22.7)                 | 17 (77.3)                |         |
| PT4                     | 2            | 0 (0.0)                 | 2 (100.0)                |         |
| pN classification       |              |                         |                          | 0.971   |
| PN0                     | 41           | 16 (39.0)               | 25 (61.0)                |         |

PN1

13

5 (38.5)

8 (61.5)

<sup>a</sup> median age. <sup>b</sup> median size. <sup>c</sup> Chi-square test.**Table S2.** Primers and shRNA used in this study.

| Name                     | Forward/Sense               | Reverse/Anti-Sense           |
|--------------------------|-----------------------------|------------------------------|
| OGT-qPCR                 | TCCTGATTTGTACTGTGTTTCGC     | AAGCTACTGCAAAGTTCGGTT        |
| OGA-qPCR                 | GAAGGAGAGTCAAGCGACGTT       | TCCATAACCCAAGGTCTTCCAT       |
| RANBP2-qPCR              | AAACCTCCGATTGCAGCTCAT       | GGCAAAGATGGCCTTAATCCT        |
| CEBP $\alpha$ -qPCR      | CTGCTATAGGCTGGGCTTCC        | AGCTGAGGGCAAAGGAGAAC         |
| GAPDH-qPCR               | GGAGCGAGATCCCTCCAAAT        | GGCTGTTGTCATACTTCTCATGG      |
| $\beta$ -actin           | CATGTACGTTGCTATCCAGGC       | CTCCTTAATGTCACGCACGAT        |
| 18S                      | CAGCCACCCGAGATTGAGCA        | TAGTAGCGACGGGCGGTGTG         |
| OGA-qPCR (for CHIP)      | GAGGCAGGAGAATAGCCTGA        | TTAGCCGTAGCCCAACTTGT         |
| GAPDH-qPCR (for CHIP)    | TACTAGCGTTTTACGGGCG         | TCGAACAGGAGGAGCAGAGAGCGA     |
| RANBP2-shRNA-3093        | CACCGCTTCAAGATCTGCAGAATCTCT | AAAAGCTTCAAGATCTGCAGAATCTCT  |
|                          | CGAGAGATTCTGCAGATCTTGAAGC   | CGAGAGATTCTGCAGATCTTGAAGC    |
| RANBP2-shRNA-3718        | CACCGCGCGAAATTGTTTCGTTTCGCT | AAAAGCGCGAAATTGTTTCGTTTCGCT  |
|                          | CGAGCGAAACGAAACAATTTTCGCGC  | CGAGCGAAACGAAACAATTTTCGCGC   |
| RANBP2-shRNA-4170        | CACCGCAAAGAAAGAAAGGGTCTTGGC | AAAAGCAAAGAAAGAAAGGGTCTTGG   |
|                          | TCGAGCCAAGACCCTTCTTTCTTTGCT | CTCGAGCCAAGACCCTTCTTTCTTTGCT |
| CEBP $\alpha$ -shRNA-945 | CACCGAAGTCGGTGGACAAGAACAGC  | AAAAGAAGTCGGTGGACAAGAACAG    |
|                          | TCGAGCTGTTCTTGTCCACCGACTTC  | CTCGAGCTGTTCTTGTCCACCGACTTC  |
| CEBP $\alpha$ -shRNA-951 | CACCGGTGGACAAGAACAGCAACGA   | AAAAGGTGGACAAGAACAGCAACGA    |
|                          | CTCGAGTCGTTGCTGTTCTTGTCCACC | CTCGAGTCGTTGCTGTTCTTGTCCACC  |
| CEBP $\alpha$ -shRNA-954 | CACCGGACAAGAACAGCAACGAGTA   | AAAAGGACAAGAACAGCAACGAGTA    |
|                          | CTCGAGTACTCGTTGCTGTTCTTGTCC | CTCGAGTACTCGTTGCTGTTCTTGTCC  |

**Table S3.** Antibodies for western blot, immunoprecipitation, immunofluorescence, and immunohistochemistry in this study.

| Primary Antibodies | Dilution                                        | Company/Catalog         |
|--------------------|-------------------------------------------------|-------------------------|
| RANBP2             | 1:1000 (WB); 1:100 (IF); 1:500 (IHC)            | Abcam, ab64276          |
| CEBP $\alpha$      | 1:500 (WB); 1:100 (IF); 1:50 (IP); 1:200 (IHC)  | Abcam, ab15047          |
| CEBP $\beta$       | 1:1000 (WB); 1:100 (IF); 1:50 (IP); 1:200 (IHC) | Abcam, ab32358          |
| O-GlcNAc           | 1:1000 (WB); 1:200 (IHC)                        | Abcam, ab2739           |
| OGT                | 1:200 (WB); 1:50 (IP); 1:200 (IHC)              | Proteintech, 11576-2-AP |
| OGA                | 1:200 (WB); 1:50 (IP); 1:200 (IHC)              | Proteintech, 14711-1-AP |
| PGC1 $\alpha$      | 1:500 (WB); 1:50 (IP)                           | Novus, NBP1-04676       |
| SUMO1              | 1:200 (WB)                                      | Proteintech, 10329-1-AP |
| GFP                | 1:1000 (WB); 1:100 (IP)                         | Abcam, ab290            |
| HA                 | 1:2000 (WB)                                     | Abcam, ab9110           |
| His                | 1:500 (WB)                                      | Abcam, ab18184M         |
| Human IgG          | 1:150 (IP)                                      | Bioss, #bs-0297P        |
| Caspase-3          | 1:200 (IHC)                                     | Proteintech, 19677-1-AP |
| Ki-67              | 1:100 (IHC)                                     | Genetex, GTX16667       |
| LAMINB1            | 1:2000 (WB)                                     | Abcam, ab65986          |
| GAPDH              | 1:4000 (WB)                                     | Abcam, ab125247         |
