# Supplementary material for: RANBP2 Activates O-GlcNAcylation through Inducing CEBPα-Dependent OGA Downregulation to Promote Hepatocellular Carcinoma Malignant Phenotypes
Source: MDPI journal article supplement (doi:10.3390/cancers13143475), 2021-07-12
Supplement: s1 [file s1]

## SHANGHAI SAILY BIOTECHNOLOGIES Co., Ltd.

### Cell Line Authentication – STR Profiling

Sample Type: Cell Line

Sample from: Central South University

Testing Method: STR Genotyping

Report Time: August 14, 2018

## COMPANY STATEMENT

1. THIS REPORT IS ONLY RESPONSIBLE FOR THE SAMPLES ANALYZED.
2. THE TESTING RESULTS AND THE ORGANIZATION NAME WILL NOT BE USED FOR ADVERTISEMENT, COMMERCIAL EXHIBITIONS, COMMERCIAL PERFORMANCE AND OTHER COMMERCIAL ACTIVITIES.
3. OBJECTIONS SHOULD BE RAISED WITHIN FIFTEEN DAYS AFTER THE RECEIPT OF THIS REPORT.
4. THE PAPER REPORT WITH CONTENT ALTERING, ADDING OR WITHOUT THE STAMPED SEAL OF THE COMPANY ARE INVALID.

**Testing Company:** Shanghai Saily Biotechnologies Co., Ltd.

**Address:** Room 303, Suite E, 1088 Kang Qiao Dong Rd., Pudong New District, Shanghai 201315

**Tel:** +86-021-60536642

**Contact:** Yang Xiang

**E-mail:** info@sailybio.com

## Cell Line Authentication – STR Profiling Report

**Sample code:**

Table 1. Sample Code

| Customer's code | Company Code |
|-----------------|--------------|
| Hep-G2          | 20180727-02  |

**Sample Number:** 1

**Sample Type:** Cell line

**Testing Type:** STR

**Sample From:**

Central South University

**Testing Method:**

DNA was extracted by a DNA extraction kit from Axygen, and amplified by 20-STR amplification protocol. The STR locus and sex gene Amelogenin of the DNA were detected on the ABI 3730XL genetic analyzer.

## Test Results:

### 1. Result

Table 2. Matching information on the cell lines

| Sample Code | Multi-allele | Cell line matched | Cell Bank | EV   | Result            |
|-------------|--------------|-------------------|-----------|------|-------------------|
| 20180727-02 | No           | Hep-G2            | DSMZ      | 1.00 | Perfectly Matched |

- Multi-allele means some STR contain more than two loci.
- The cell typing results of this test are good.

### 2. Sample Description

20180727-02: The DNA typing of the cell lines found to **perfectly match** the type of cell lines in a cell line retrieval. DSMZ database shows that the cells called **GS-HepG2**, corresponding to the cell number **RCB-1681**. **No multiple alleles** were found in this cell line.

**Note:** The cell lines to be tested compared with the cell line STR data collected in ATCC, DSMZ, JCRB, RIKEN database, and the cell lines not included in those cell banks can not be matched.

### 3. Genotyping Result

Table 3. STR and Amelogenin Genotyping Results of Cell line 20180727-02

| Marker  | Sample  |         |         | Cell Bank information |         |         |
|---------|---------|---------|---------|-----------------------|---------|---------|
|         | Allele1 | Allele2 | Allele3 | Allele1               | Allele2 | Allele3 |
| D5S818  | 11      | 12      |         | 11                    | 12      |         |
| D13S317 | 9       | 13      |         | 9                     | 13      |         |
| D7S820  | 10      | 10      |         | 10                    | 10      |         |
| D16S539 | 12      | 12      |         | 12                    | 12      |         |
| VWA     | 17      | 17      |         | 17                    | 17      |         |
| TH01    | 9       | 9       |         | 9                     | 9       |         |
| AMEL    | X       | Y       |         | X                     | Y       |         |
| TPOX    | 8       | 9       |         | 8                     | 9       |         |
| CSF1PO  | 10      | 11      |         | 10                    | 11      |         |
| D12S391 | 21      | 25      |         |                       |         |         |
| FGA     | 22      | 25      |         |                       |         |         |
| D2S1338 | 19      | 20      |         |                       |         |         |
| D21S11  | 13      | 14      |         |                       |         |         |
| D18S51  | 15      | 16      |         |                       |         |         |
| D8S1179 | 15      | 16      |         |                       |         |         |
| D3S1358 | 13      | 13      |         |                       |         |         |
| D6S1043 | 15      | 20      |         |                       |         |         |
| PENTAE  | 15.2    | 15.2    |         |                       |         |         |
| D19S433 | 9       | 13      |         |                       |         |         |
| PENTAD  | 11      | 12      |         |                       |         |         |

## Others:

### 1. Genotyping Strategy and Site Distribution

Attached Table. Experimental Strategy and Sites

|   | Strategy 1 | Strategy 2 | Strategy 3 | Strategy 4 | Strategy 5 | Strategy 6 |
|---|------------|------------|------------|------------|------------|------------|
| 1 | TH01       | AMEL       | TPOX       | D3S1358    | PENTAE     | D19S433    |
| 2 | D12S391    | D5S818     | VWA        | D13S317    |            | PENTAD     |
| 3 | D7S820     | D2S1338    | D8S1179    | D6S1043    |            |            |
| 4 | CSF1PO     | D18S51     |            | D16S539    |            |            |
| 5 | FGA        |            |            |            |            |            |

2. DSMZ tools was used to carry on the cell line comparison, which contains 2455 cell lines STR data from ATCC, DSMZ, JCRB, ECACC and RIKEN databases. If the cell is not included in the above cell library, the users need to compare with other databases.

Inspector: Menglu Shen

Reviewer: Yang Bai

Approved: Yiqun Chen

Issue date: August 14, 2018
