# Supplementary material for: RANBP2 Activates O-GlcNAcylation through Inducing CEBPα-Dependent OGA Downregulation to Promote Hepatocellular Carcinoma Malignant Phenotypes
Source: MDPI journal article supplement (doi:10.3390/cancers13143475), 2021-07-12
Supplement: s1 [file s1]

qPCR data\_Supplemental Figure 3C\_OGA mRNA stability assay

| Hep3B cell |             |                |        |         |                 |                  |              |                     |
|------------|-------------|----------------|--------|---------|-----------------|------------------|--------------|---------------------|
| Well       | Sample Name | C <sub>T</sub> | RQ     | RQ Mean | ΔC <sub>T</sub> | ΔΔC <sub>T</sub> | Time elapsed | Annotation          |
| A1         | A           | 27.385         | 1.0072 | 1.0037  | -0.0103         | 0.0103           | A-0h         | A = NC group        |
| A2         | A           | 27.3454        | 0.9659 |         | 0.0501          | -0.0501          |              | B = sh-RANBP2 group |
| A3         | A           | 27.2941        | 1.0382 |         | -0.0541         | 0.0541           |              |                     |
| A4         | A-18S       | 18.7638        | 1.0133 | 0.9834  | -0.019          | 0.019            |              |                     |
| A5         | A-18S       | 18.9236        | 0.9286 |         | 0.1068          | -0.1068          |              |                     |
| A6         | A-18S       | 18.7764        | 1.0083 |         | -0.0119         | 0.0119           |              |                     |
| A7         | A-β-Actin   | 17.4305        | 1.0185 | 1.0059  | -0.0264         | 0.0264           |              |                     |
| A8         | A-β-Actin   | 17.4405        | 1.0332 |         | -0.0471         | 0.0471           |              |                     |
| A9         | A-β-Actin   | 17.5577        | 0.9659 |         | 0.05            | -0.05            |              |                     |
| B1         | B           | 27.3446        | 1.0358 | 0.8958  | -0.0507         | 0.0507           | A-2h         |                     |
| B2         | B           | 27.6315        | 0.7921 |         | 0.3362          | -0.3362          |              |                     |
| B3         | B           | 27.5666        | 0.8595 |         | 0.2184          | -0.2184          |              |                     |
| B4         | B-18S       | 18.8926        | 0.9267 | 0.9534  | 0.1098          | -0.1098          |              |                     |
| B5         | B-18S       | 18.8267        | 0.9932 |         | 0.0099          | -0.0099          |              |                     |
| B6         | B-18S       | 18.8773        | 0.9402 |         | 0.089           | -0.089           |              |                     |
| B7         | B-β-Actin   | 17.4123        | 1.0314 | 0.9937  | -0.0446         | 0.0446           |              |                     |
| B8         | B-β-Actin   | 17.4744        | 1.0092 |         | -0.0132         | 0.0132           |              |                     |
| B9         | B-β-Actin   | 17.5963        | 0.9404 |         | 0.0886          | -0.0886          |              |                     |
| C1         | C           | 27.4606        | 0.9557 | 0.8329  | 0.0653          | -0.0653          | A-4h         |                     |
| C2         | C           | 27.7051        | 0.7527 |         | 0.4098          | -0.4098          |              |                     |
| C3         | C           | 27.6877        | 0.7903 |         | 0.3395          | -0.3395          |              |                     |
| C4         | C-18S       | 18.9328        | 0.9013 | 0.965   | 0.15            | -0.15            |              |                     |
| C5         | C-18S       | 18.83          | 0.9909 |         | 0.0132          | -0.0132          |              |                     |
| C6         | C-18S       | 18.7842        | 1.0028 |         | -0.0041         | 0.0041           |              |                     |
| C7         | C-β-Actin   | 17.6145        | 0.8965 | 0.9368  | 0.1576          | -0.1576          |              |                     |
| C8         | C-β-Actin   | 17.5594        | 0.9515 |         | 0.0718          | -0.0718          |              |                     |
| C9         | C-β-Actin   | 17.5629        | 0.9625 |         | 0.0552          | -0.0552          |              |                     |
| D1         | D           | 27.8694        | 0.7199 | 0.7456  | 0.4741          | -0.4741          | A-6h         |                     |
| D2         | D           | 27.6679        | 0.7724 |         | 0.3726          | -0.3726          |              |                     |
| D3         | D           | 27.7739        | 0.7445 |         | 0.4257          | -0.4257          |              |                     |
| D4         | D-18S       | 18.8634        | 0.9457 | 0.9168  | 0.0806          | -0.0806          |              |                     |
| D5         | D-18S       | 18.9572        | 0.9073 |         | 0.1404          | -0.1404          |              |                     |
| D6         | D-18S       | 18.9442        | 0.8976 |         | 0.1559          | -0.1559          |              |                     |
| D7         | D-β-Actin   | 17.6332        | 0.885  | 0.886   | 0.1763          | -0.1763          |              |                     |
| D8         | D-β-Actin   | 17.6405        | 0.8994 |         | 0.1529          | -0.1529          |              |                     |
| D9         | D-β-Actin   | 17.7026        | 0.8736 |         | 0.1949          | -0.1949          |              |                     |
| E1         | E           | 27.9082        | 0.7008 | 0.6977  | 0.5129          | -0.5129          | A-8h         |                     |
| E2         | E           | 27.7796        | 0.7148 |         | 0.4843          | -0.4843          |              |                     |
| E3         | E           | 27.91          | 0.6775 |         | 0.5618          | -0.5618          |              |                     |
| E4         | E-18S       | 18.9349        | 0.8999 | 0.9541  | 0.1521          | -0.1521          |              |                     |
| E5         | E-18S       | 18.8024        | 1.01   |         | -0.0144         | 0.0144           |              |                     |
| E6         | E-18S       | 18.8586        | 0.9524 |         | 0.0703          | -0.0703          |              |                     |
| E7         | E-β-Actin   | 17.7003        | 0.8448 | 0.8527  | 0.2434          | -0.2434          |              |                     |
| E8         | E-β-Actin   | 17.6957        | 0.8657 |         | 0.2081          | -0.2081          |              |                     |
| E9         | E-β-Actin   | 17.7461        | 0.8477 |         | 0.2384          | -0.2384          |              |                     |
| F1         | F           | 27.9934        | 0.6606 | 0.6389  | 0.5981          | -0.5981          | A-12h        |                     |
| F2         | F           | 27.9027        | 0.6564 |         | 0.6074          | -0.6074          |              |                     |

|    |                   |         |        |        |         |         |             |
|----|-------------------|---------|--------|--------|---------|---------|-------------|
| F3 | F                 | 28.0858 | 0.5997 |        | 0.7376  | -0.7376 |             |
| F4 | F-18S             | 18.906  | 0.9181 | 0.9117 | 0.1232  | -0.1232 |             |
| F5 | F-18S             | 18.9    | 0.944  |        | 0.0832  | -0.0832 |             |
| F6 | F-18S             | 18.9843 | 0.873  |        | 0.196   | -0.196  |             |
| F7 | F- $\beta$ -Actin | 17.8532 | 0.7598 | 0.8118 | 0.3963  | -0.3963 |             |
| F8 | F- $\beta$ -Actin | 17.7137 | 0.8549 |        | 0.2261  | -0.2261 |             |
| F9 | F- $\beta$ -Actin | 17.793  | 0.8206 |        | 0.2853  | -0.2853 |             |
| G1 | G                 | 27.4384 | 0.9706 | 0.9781 | 0.0431  | -0.0431 | <b>B-0h</b> |
| G2 | G                 | 27.2655 | 1.0209 |        | -0.0298 | 0.0298  |             |
| G3 | G                 | 27.4331 | 0.9428 |        | 0.0849  | -0.0849 |             |
| G4 | G-18S             | 18.8177 | 0.9761 | 0.9881 | 0.0349  | -0.0349 |             |
| G5 | G-18S             | 18.8593 | 0.971  |        | 0.0425  | -0.0425 |             |
| G6 | G-18S             | 18.7637 | 1.0172 |        | -0.0246 | 0.0246  |             |
| G7 | G- $\beta$ -Actin | 17.571  | 0.924  | 0.987  | 0.1141  | -0.1141 |             |
| G8 | G- $\beta$ -Actin | 17.4815 | 1.0042 |        | -0.0061 | 0.0061  |             |
| G9 | G- $\beta$ -Actin | 17.4613 | 1.0327 |        | -0.0464 | 0.0464  |             |
| H1 | H                 | 27.6362 | 0.8462 | 0.8411 | 0.2409  | -0.2409 | <b>B-2h</b> |
| H2 | H                 | 27.6292 | 0.7934 |        | 0.3339  | -0.3339 |             |
| H3 | H                 | 27.5265 | 0.8837 |        | 0.1783  | -0.1783 |             |
| H4 | H-18S             | 18.9206 | 0.9089 | 0.9611 | 0.1378  | -0.1378 |             |
| H5 | H-18S             | 18.7165 | 1.072  |        | -0.1003 | 0.1003  |             |
| H6 | H-18S             | 18.9367 | 0.9023 |        | 0.1484  | -0.1484 |             |
| H7 | H- $\beta$ -Actin | 17.6188 | 0.8938 | 1.0025 | 0.1619  | -0.1619 |             |
| H8 | H- $\beta$ -Actin | 17.4135 | 1.0527 |        | -0.0741 | 0.0741  |             |
| H9 | H- $\beta$ -Actin | 17.4225 | 1.0608 |        | -0.0852 | 0.0852  |             |
| I1 | I                 | 27.7956 | 0.7577 | 0.704  | 0.4003  | -0.4003 | <b>B-4h</b> |
| I2 | I                 | 27.8246 | 0.6929 |        | 0.5293  | -0.5293 |             |
| I3 | I                 | 27.9448 | 0.6613 |        | 0.5966  | -0.5966 |             |
| I4 | I-18S             | 18.9285 | 0.9039 | 0.9562 | 0.1457  | -0.1457 |             |
| I5 | I-18S             | 18.8297 | 0.9911 |        | 0.0129  | -0.0129 |             |
| I6 | I-18S             | 18.8271 | 0.9735 |        | 0.0388  | -0.0388 |             |
| I7 | I- $\beta$ -Actin | 17.6191 | 0.8937 | 0.9166 | 0.1622  | -0.1622 |             |
| I8 | I- $\beta$ -Actin | 17.6453 | 0.8965 |        | 0.1577  | -0.1577 |             |
| I9 | I- $\beta$ -Actin | 17.5671 | 0.9597 |        | 0.0594  | -0.0594 |             |
| J1 | J                 | 28.1278 | 0.6019 | 0.6035 | 0.7325  | -0.7325 | <b>B-6h</b> |
| J2 | J                 | 28.0157 | 0.6069 |        | 0.7204  | -0.7204 |             |
| J3 | J                 | 28.081  | 0.6017 |        | 0.7328  | -0.7328 |             |
| J4 | J-18S             | 19.0321 | 0.8413 | 0.9074 | 0.2493  | -0.2493 |             |
| J5 | J-18S             | 18.9354 | 0.9211 |        | 0.1186  | -0.1186 |             |
| J6 | J-18S             | 18.8475 | 0.9598 |        | 0.0592  | -0.0592 |             |
| J7 | J- $\beta$ -Actin | 17.623  | 0.8912 | 0.8784 | 0.1661  | -0.1661 |             |
| J8 | J- $\beta$ -Actin | 17.7237 | 0.849  |        | 0.2361  | -0.2361 |             |
| J9 | J- $\beta$ -Actin | 17.668  | 0.8948 |        | 0.1603  | -0.1603 |             |
| K1 | K                 | 28.3521 | 0.5152 | 0.5608 | 0.9568  | -0.9568 | <b>B-8h</b> |
| K2 | K                 | 28.1788 | 0.5421 |        | 0.8835  | -0.8835 |             |
| K3 | K                 | 28.0256 | 0.6253 |        | 0.6774  | -0.6774 |             |
| K4 | K-18S             | 18.9516 | 0.8896 | 0.9364 | 0.1688  | -0.1688 |             |
| K5 | K-18S             | 18.8457 | 0.9802 |        | 0.0289  | -0.0289 |             |
| K6 | K-18S             | 18.8786 | 0.9393 |        | 0.0903  | -0.0903 |             |
| K7 | K- $\beta$ -Actin | 17.8512 | 0.7609 | 0.8126 | 0.3943  | -0.3943 |             |
| K8 | K- $\beta$ -Actin | 17.7666 | 0.8242 |        | 0.279   | -0.279  |             |
| K9 | K- $\beta$ -Actin | 17.7375 | 0.8528 |        | 0.2298  | -0.2298 |             |

|    |                   |         |        |        |        |         |              |
|----|-------------------|---------|--------|--------|--------|---------|--------------|
| L1 | L                 | 28.1986 | 0.573  | 0.5244 | 0.8033 | -0.8033 | <b>B-12h</b> |
| L2 | L                 | 28.3513 | 0.481  |        | 1.056  | -1.056  |              |
| L3 | L                 | 28.294  | 0.5191 |        | 0.9458 | -0.9458 |              |
| L4 | L-18S             | 19.0401 | 0.8367 | 0.9015 | 0.2573 | -0.2573 |              |
| L5 | L-18S             | 18.8618 | 0.9693 |        | 0.045  | -0.045  |              |
| L6 | L-18S             | 18.9425 | 0.8986 |        | 0.1542 | -0.1542 |              |
| L7 | L- $\beta$ -Actin | 17.764  | 0.8083 | 0.7897 | 0.3071 | -0.3071 |              |
| L8 | L- $\beta$ -Actin | 17.8879 | 0.7577 |        | 0.4003 | -0.4003 |              |
| L9 | L- $\beta$ -Actin | 17.8241 | 0.8031 |        | 0.3164 | -0.3164 |              |

| HepG2 cell |                   |         |        |         |             |                   |              |                     |
|------------|-------------------|---------|--------|---------|-------------|-------------------|--------------|---------------------|
| Well       | Sample Name       | Ct      | RQ     | RQ Mean | $\Delta$ Ct | $\Delta\Delta$ Ct | Time elapsed | Annotation          |
| A1         | A                 | 26.4418 | 1      | 1       | 0           | 0                 | <b>A-0h</b>  | A = NC group        |
| A2         | A                 | 26.2541 | 1      |         | 0           | 0                 |              | B = sh-RANBP2 group |
| A3         | A                 | 26.424  | 1      |         | 0           | 0                 |              |                     |
| A4         | A-18S             | 18.1638 | 1      | 1       | 0           | 0                 |              |                     |
| A5         | A-18S             | 18.2227 | 1      |         | 0           | 0                 |              |                     |
| A6         | A-18S             | 18.3667 | 1      |         | 0           | 0                 |              |                     |
| A7         | A- $\beta$ -Actin | 17.2541 | 1      | 1       | 0           | 0                 |              |                     |
| A8         | A- $\beta$ -Actin | 17.1049 | 1      |         | 0           | 0                 |              |                     |
| A9         | A- $\beta$ -Actin | 17.226  | 1      |         | 0           | 0                 |              |                     |
| B1         | B                 | 26.7331 | 0.8172 | 0.8167  | 0.2913      | -0.2913           | <b>A-2h</b>  |                     |
| B2         | B                 | 26.5867 | 0.7941 |         | 0.3326      | -0.3326           |              |                     |
| B3         | B                 | 26.6776 | 0.8388 |         | 0.2536      | -0.2536           |              |                     |
| B4         | B-18S             | 18.2918 | 0.9151 | 0.9986  | 0.128       | -0.128            |              |                     |
| B5         | B-18S             | 18.2013 | 1.0149 |         | -0.0214     | 0.0214            |              |                     |
| B6         | B-18S             | 18.275  | 1.0656 |         | -0.0917     | 0.0917            |              |                     |
| B7         | B- $\beta$ -Actin | 17.1665 | 1.0626 | 0.9564  | -0.0876     | 0.0876            |              |                     |
| B8         | B- $\beta$ -Actin | 17.3026 | 0.8719 |         | 0.1977      | -0.1977           |              |                     |
| B9         | B- $\beta$ -Actin | 17.3233 | 0.9348 |         | 0.0973      | -0.0973           |              |                     |
| C1         | C                 | 27.071  | 0.6465 | 0.6495  | 0.6292      | -0.6292           | <b>A-4h</b>  |                     |
| C2         | C                 | 27.0228 | 0.5869 |         | 0.7687      | -0.7687           |              |                     |
| C3         | C                 | 26.9081 | 0.7149 |         | 0.4841      | -0.4841           |              |                     |
| C4         | C-18S             | 18.2267 | 0.9573 | 0.988   | 0.0629      | -0.0629           |              |                     |
| C5         | C-18S             | 18.1888 | 1.0238 |         | -0.0339     | 0.0339            |              |                     |
| C6         | C-18S             | 18.3916 | 0.9829 |         | 0.0249      | -0.0249           |              |                     |
| C7         | C- $\beta$ -Actin | 17.3458 | 0.9384 | 0.9337  | 0.0917      | -0.0917           |              |                     |
| C8         | C- $\beta$ -Actin | 17.2708 | 0.8914 |         | 0.1659      | -0.1659           |              |                     |
| C9         | C- $\beta$ -Actin | 17.2678 | 0.9714 |         | 0.0418      | -0.0418           |              |                     |
| D1         | D                 | 27.3238 | 0.5426 | 0.5723  | 0.882       | -0.882            | <b>A-6h</b>  |                     |
| D2         | D                 | 27.1435 | 0.5398 |         | 0.8894      | -0.8894           |              |                     |
| D3         | D                 | 27.0801 | 0.6346 |         | 0.6561      | -0.6561           |              |                     |
| D4         | D-18S             | 18.3591 | 0.8734 | 0.9051  | 0.1953      | -0.1953           |              |                     |
| D5         | D-18S             | 18.4326 | 0.8646 |         | 0.2099      | -0.2099           |              |                     |
| D6         | D-18S             | 18.3999 | 0.9773 |         | 0.0332      | -0.0332           |              |                     |
| D7         | D- $\beta$ -Actin | 17.3426 | 0.9405 | 0.8735  | 0.0885      | -0.0885           |              |                     |
| D8         | D- $\beta$ -Actin | 17.4035 | 0.813  |         | 0.2986      | -0.2986           |              |                     |
| D9         | D- $\beta$ -Actin | 17.432  | 0.8669 |         | 0.206       | -0.206            |              |                     |
| E1         | E                 | 27.4976 | 0.481  | 0.4683  | 1.0558      | -1.0558           | <b>A-8h</b>  |                     |

|    |                   |         |        |        |         |         |       |
|----|-------------------|---------|--------|--------|---------|---------|-------|
| E2 | E                 | 27.4528 | 0.4357 |        | 1.1987  | -1.1987 |       |
| E3 | E                 | 27.4582 | 0.4883 |        | 1.0342  | -1.0342 |       |
| E4 | E-18S             | 18.3433 | 0.883  | 0.9213 | 0.1795  | -0.1795 |       |
| E5 | E-18S             | 18.3777 | 0.8981 |        | 0.155   | -0.155  |       |
| E6 | E-18S             | 18.3918 | 0.9828 |        | 0.0251  | -0.0251 |       |
| E7 | E- $\beta$ -Actin | 17.3922 | 0.9087 | 0.8478 | 0.1381  | -0.1381 |       |
| E8 | E- $\beta$ -Actin | 17.4108 | 0.8089 |        | 0.3059  | -0.3059 |       |
| E9 | E- $\beta$ -Actin | 17.5021 | 0.8258 |        | 0.2761  | -0.2761 |       |
| F1 | F                 | 27.654  | 0.4316 | 0.4025 | 1.2122  | -1.2122 | A-12h |
| F2 | F                 | 27.7632 | 0.3513 |        | 1.5091  | -1.5091 |       |
| F3 | F                 | 27.6598 | 0.4246 |        | 1.2358  | -1.2358 |       |
| F4 | F-18S             | 18.2553 | 0.9385 | 0.9135 | 0.0915  | -0.0915 |       |
| F5 | F-18S             | 18.4769 | 0.8385 |        | 0.2542  | -0.2542 |       |
| F6 | F-18S             | 18.4202 | 0.9636 |        | 0.0535  | -0.0535 |       |
| F7 | F- $\beta$ -Actin | 17.4454 | 0.8758 | 0.8183 | 0.1913  | -0.1913 |       |
| F8 | F- $\beta$ -Actin | 17.5132 | 0.7535 |        | 0.4083  | -0.4083 |       |
| F9 | F- $\beta$ -Actin | 17.5024 | 0.8256 |        | 0.2764  | -0.2764 |       |
| G1 | G                 | 26.342  | 1.0716 | 1.0224 | -0.0998 | 0.0998  | B-0h  |
| G2 | G                 | 26.3748 | 0.9197 |        | 0.1207  | -0.1207 |       |
| G3 | G                 | 26.3187 | 1.0757 |        | -0.1053 | 0.1053  |       |
| G4 | G-18S             | 18.1942 | 0.9791 | 0.9954 | 0.0304  | -0.0304 |       |
| G5 | G-18S             | 18.339  | 0.9226 |        | 0.1163  | -0.1163 |       |
| G6 | G-18S             | 18.2497 | 1.0845 |        | -0.117  | 0.117   |       |
| G7 | G- $\beta$ -Actin | 17.1531 | 1.0725 | 1.0332 | -0.101  | 0.101   |       |
| G8 | G- $\beta$ -Actin | 17.1157 | 0.9925 |        | 0.0108  | -0.0108 |       |
| G9 | G- $\beta$ -Actin | 17.1771 | 1.0345 |        | -0.0489 | 0.0489  |       |
| H1 | H                 | 26.4971 | 0.8563 | 0.8294 | 0.1551  | -0.1551 | B-2h  |
| H2 | H                 | 26.5983 | 0.7997 |        | 0.2235  | -0.2235 |       |
| H3 | H                 | 26.5025 | 0.8321 |        | 0.1838  | -0.1838 |       |
| H4 | H-18S             | 18.298  | 0.9112 | 0.9853 | 0.1342  | -0.1342 |       |
| H5 | H-18S             | 18.3318 | 0.9272 |        | 0.1091  | -0.1091 |       |
| H6 | H-18S             | 18.2062 | 1.1177 |        | -0.1605 | 0.1605  |       |
| H7 | H- $\beta$ -Actin | 17.2929 | 0.9735 | 0.977  | 0.0388  | -0.0388 |       |
| H8 | H- $\beta$ -Actin | 17.2841 | 0.8832 |        | 0.1792  | -0.1792 |       |
| H9 | H- $\beta$ -Actin | 17.1227 | 1.0742 |        | -0.1033 | 0.1033  |       |
| I1 | I                 | 26.8035 | 0.6303 | 0.6156 | 0.4615  | -0.4615 | B-4h  |
| I2 | I                 | 26.8519 | 0.6206 |        | 0.4771  | -0.4771 |       |
| I3 | I                 | 26.8166 | 0.6078 |        | 0.4979  | -0.4979 |       |
| I4 | I-18S             | 18.3219 | 0.8962 | 0.9594 | 0.1581  | -0.1581 |       |
| I5 | I-18S             | 18.234  | 0.9922 |        | 0.0113  | -0.0113 |       |
| I6 | I-18S             | 18.3815 | 0.9898 |        | 0.0148  | -0.0148 |       |
| I7 | I- $\beta$ -Actin | 17.3449 | 0.939  | 0.919  | 0.0908  | -0.0908 |       |
| I8 | I- $\beta$ -Actin | 17.3295 | 0.8558 |        | 0.2246  | -0.2246 |       |
| I9 | I- $\beta$ -Actin | 17.2818 | 0.9621 |        | 0.0558  | -0.0558 |       |
| J1 | J                 | 26.8369 | 0.6096 | 0.6204 | 0.4949  | -0.4949 | B-6h  |
| J2 | J                 | 26.7992 | 0.6541 |        | 0.4244  | -0.4244 |       |
| J3 | J                 | 26.8324 | 0.5977 |        | 0.5146  | -0.5146 |       |
| J4 | J-18S             | 18.4365 | 0.8278 | 0.9532 | 0.2727  | -0.2727 |       |
| J5 | J-18S             | 18.2763 | 0.9635 |        | 0.0536  | -0.0536 |       |
| J6 | J-18S             | 18.2714 | 1.0683 |        | -0.0953 | 0.0953  |       |
| J7 | J- $\beta$ -Actin | 17.4316 | 0.8842 | 0.8737 | 0.1775  | -0.1775 |       |
| J8 | J- $\beta$ -Actin | 17.3477 | 0.8451 |        | 0.2428  | -0.2428 |       |

|    |                   |         |        |        |         |         |              |
|----|-------------------|---------|--------|--------|---------|---------|--------------|
| J9 | J- $\beta$ -Actin | 17.3913 | 0.8917 |        | 0.1653  | -0.1653 |              |
| K1 | K                 | 26.9894 | 0.5234 | 0.5029 | 0.6474  | -0.6474 | <b>B-8h</b>  |
| K2 | K                 | 27.0292 | 0.5244 |        | 0.6544  | -0.6544 |              |
| K3 | K                 | 27.0935 | 0.4608 |        | 0.7748  | -0.7748 |              |
| K4 | K-18S             | 18.4126 | 0.8416 | 0.9146 | 0.2488  | -0.2488 |              |
| K5 | K-18S             | 18.4065 | 0.8804 |        | 0.1838  | -0.1838 |              |
| K6 | K-18S             | 18.3356 | 1.0218 |        | -0.0311 | 0.0311  |              |
| K7 | K- $\beta$ -Actin | 17.4914 | 0.8483 | 0.8567 | 0.2373  | -0.2373 |              |
| K8 | K- $\beta$ -Actin | 17.3664 | 0.8342 |        | 0.2615  | -0.2615 |              |
| K9 | K- $\beta$ -Actin | 17.3983 | 0.8874 |        | 0.1723  | -0.1723 |              |
| L1 | L                 | 27.1113 | 0.4633 | 0.418  | 0.7693  | -0.7693 | <b>B-12h</b> |
| L2 | L                 | 27.2782 | 0.4052 |        | 0.9034  | -0.9034 |              |
| L3 | L                 | 27.2716 | 0.3856 |        | 0.9529  | -0.9529 |              |
| L4 | L-18S             | 18.377  | 0.8626 | 0.9183 | 0.2132  | -0.2132 |              |
| L5 | L-18S             | 18.4186 | 0.873  |        | 0.1959  | -0.1959 |              |
| L6 | L-18S             | 18.3394 | 1.0191 |        | -0.0273 | 0.0273  |              |
| L7 | L- $\beta$ -Actin | 17.4713 | 0.8602 | 0.8398 | 0.2172  | -0.2172 |              |
| L8 | L- $\beta$ -Actin | 17.5156 | 0.7523 |        | 0.4107  | -0.4107 |              |
| L9 | L- $\beta$ -Actin | 17.367  | 0.9069 |        | 0.141   | -0.141  |              |
